# Supplementary material
Source: HighWire-hosted journal article supplement (https://rapm.bmj.com/highwire/filestream/21713/field_highwire_adjunct_files/8/rapm-2022-104236supp009_data_supplement.pdf)
Supplement: rapm-2022-104236supp009_data_supplement.pdf [file rapm-2022-104236supp009_data_supplement.pdf]

### Supplementary Table 9 Multiple Comparison Adjustment with the Benjamini-Hochberg Procedure

The main hypothesis tests in this study are those in the Cox proportional models of the rates of subsequent interventions and long-term complications, and those in the logistic regression of life-threatening events. These hazard ratios and odds ratios are adjusted using patient demographics and clinical characteristics. We determined that the Benjamini-Hochberg procedure was the most appropriate method to control for the false discovery rate (FDR). Following the Benjamini-Hochberg procedure, the individual p-values of the main hypothesis tests were listed in an ascending order and assigned ranks from 1 (smallest p-value) to 10 (largest p-value) (See Table).

The Benjamini-Hochberg critical value is calculated using the formula:

$$\text{Critical value} = (i/m) \cdot Q$$

i = the individual p-value's rank; m = total number of tests (10 tests); Q = the FDR which we set to be 5% (0.05)

The original p-values are then compared to the Benjamini-Hochberg critical value to determine statistical significance.

| Study Outcomes                                   | p-value          | rank     | Benjamini-Hochberg critical value |
|--------------------------------------------------|------------------|----------|-----------------------------------|
| <b>Rate of any subsequent spine intervention</b> | <b>&lt;0.001</b> | <b>1</b> | <b>0.005</b>                      |
| <b>Rate of any LSS intervention</b>              | <b>&lt;0.001</b> | <b>2</b> | <b>0.010</b>                      |
| <b>Rate of a subsequent MILD</b>                 | <b>&lt;0.001</b> | <b>3</b> | <b>0.015</b>                      |
| <b>Rate of other spine interventions</b>         | <b>0.013</b>     | <b>4</b> | <b>0.020</b>                      |
| <b>Rate of open decompression</b>                | <b>0.015</b>     | <b>5</b> | <b>0.025</b>                      |
| Rate of spinal cord stimulation                  | 0.053            | 6        | 0.030                             |
| Rate of a subsequent ISD                         | 0.241            | 7        | 0.035                             |
| Risk of a short term complication                | 0.433            | 8        | 0.040                             |
| Rate of fusion                                   | 0.617            | 9        | 0.045                             |
| Risk of a long term complication                 | 0.747            | 10       | 0.050                             |

The largest p-value that is smaller than the Benjamini-Hochberg critical value is significant, and all the p values smaller than the largest value are also significant. In this analysis, the p-values of the outcomes that are bold are significant. The findings of this study remain consistent after this adjustment to control for the FDR.

#### References

Lee S, Lee DK. What is the proper way to apply the multiple comparison test? Korean J Anesthesiol. 2018 Oct;71(5):353-360.

T Beyer, W. H. CRC Standard Mathematical Tables, 31st ed. Boca Raton, FL: CRC Press, pp. 536 and 571, 2002.

Vogt, W.P. (2005). Dictionary of Statistics & Methodology: A Nontechnical Guide for the Social Sciences. SAGE
